# Supplementary material for: SMRT and NCoR1 fine-tune inflammatory versus tolerogenic balance in dendritic cells by differentially regulating STAT3 signaling
Source: PubMed Central journal article supplement (PMC9552960; doi:10.3389/fimmu.2022.910705), 2022-09-27
Supplement: DataSheet_2.pdf [file DataSheet_2.pdf]

## Supplementary Figure 2

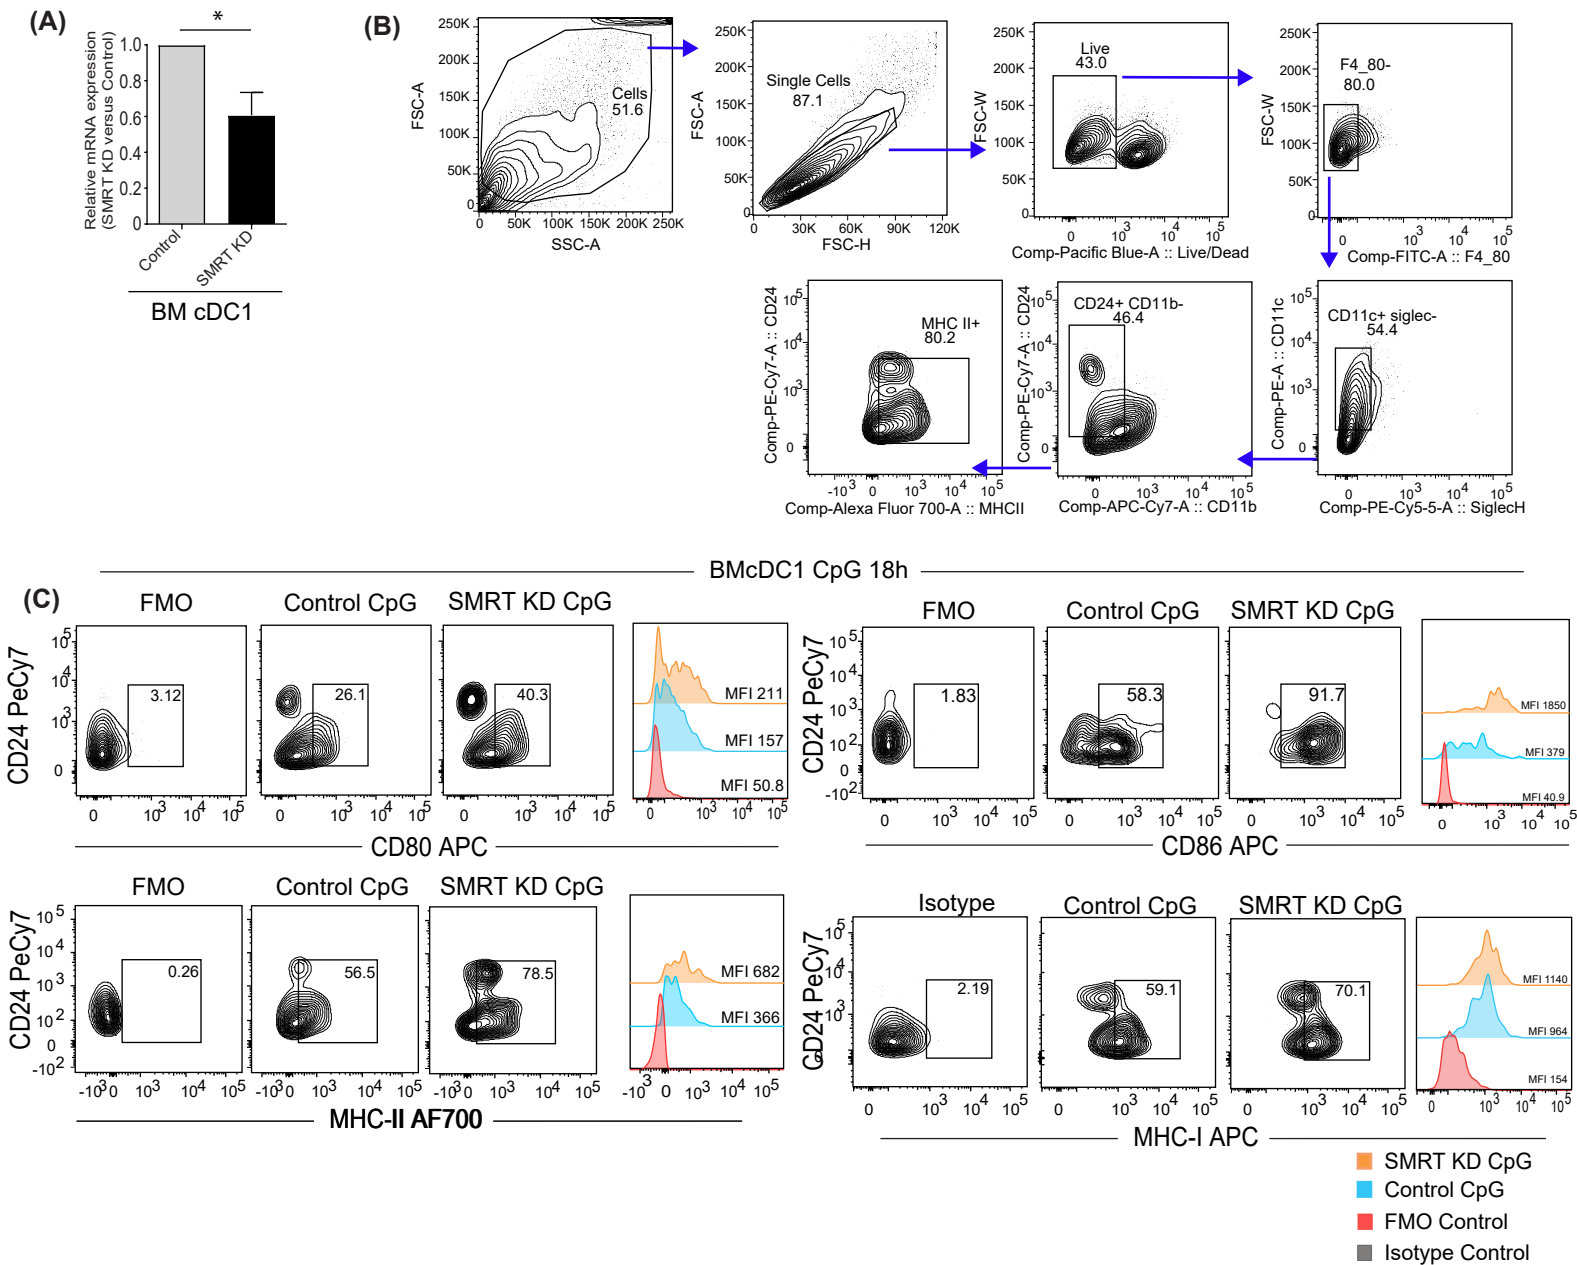

**Figure S2. SMRT depleted bone-marrow derived DCs differentiated with FLT3 ligand exhibit enhanced co-stimulation upon CpG stimulation.** (A) Relative mRNA expression of *Ncor2* in BMcDC1, error bars represent SEM (n=3). (B) Back gating strategy used to identify cDC1 population from FLT3 differentiated murine bone marrow cells. (C) Contour plots representing CD80, CD86, MHC-II and MHC-I in 18h CpG stimulated control and SMRT KD BMcDC1. \* $p \leq 0.05$ , \*\* $p \leq 0.01$  and \*\*\* $p \leq 0.001$ . p-value has been calculated using two tailed unpaired student's t-test. Data shown in figure is combined from at least 3 independent experiments
